# Supplementary material for: A phase I pilot study evaluating the beneficial effects of black raspberries in patients with Barrett’s esophagus
Source: PubMed Central journal article supplement (PMC6219678; doi:10.18632/oncotarget.10457), 2016-07-07
Supplement: oncotarget-09-35356-s001.pdf [file oncotarget-09-35356-s001.pdf]

## A phase I pilot study evaluating the beneficial effects of black raspberries in patients with Barrett's esophagus

### SUPPLEMENTARY TABLES

Supplementary Table S1: Individual level patient compliance and urinary levels of ellagitannin metabolites at baseline, 12 and 26 weeks of study

| Pat ID | LBR Compliance (%) | Urolithin A-Glucuronide (ng/mL) |         |         | Urolithin A-Sulfate (ng/mL) |         |         | Dimethylellagic Acid Glucuronide (ng/mL) |         |         |
|--------|--------------------|---------------------------------|---------|---------|-----------------------------|---------|---------|------------------------------------------|---------|---------|
|        |                    | Week 0                          | Week 12 | Week 26 | Week 0                      | Week 12 | Week 26 | Week 0                                   | Week 12 | Week 26 |
| 1      | 90.6               | 0                               | 0       | 0       | 0                           | 0       | 0       | 0                                        | 24      | 5.7     |
| 2      | 91.1               | 0                               | 280     | 1500    | 0                           | 0       | 0       | 0                                        | 112     | 28      |
| 3      | 99.4               | 0                               | 162     | 50      | 0                           | 0       | 0       | 0                                        | 125     | 0       |
| 4      | 100                | 0                               | 1920    | 2460    | 0                           | 160     | 280     | 0                                        | 16      | 0       |
| 5      | 100                | 810                             | 1020    | 2880    | 0                           | 96      | 170     | 0                                        | 72      | 8.2     |
| 6      | 96.6               | 0                               | 1720    | 590     | 0                           | 290     | 96      | 0                                        | 81      | 10      |
| 7      | 100                | 340                             | 4460    | 4020    | 0                           | 360     | 90      | 0                                        | 55      | 18      |
| 8      | 94.2               | 0                               | 2760    | 2660    | 0                           | 160     | 104     | 0                                        | 42      | 8.4     |
| 9      | 100                | 0                               | 2540    | 2570    | 0                           | 215     | 84      | 0                                        | 27      | 0       |
| 10     | 86.1               | 0                               | 320     | 110     | 0                           | 0       | 0       | 0                                        | 29      | 0       |
| 11     | 99.4               | 0                               | 0       | 0       | 0                           | 0       | 0       | 0                                        | 67      | 5.8     |
| 12     | 96.7               | 0                               | 1440    | 1620    | 0                           | 104     | 76      | 0                                        | 47      | 5.1     |
| 13     | 98.9               | 0                               | 0       | 0       | 0                           | 0       | 0       | 0                                        | 49      | 16      |
| 14     | 97.3               | 240                             | 1580    | 3950    | 0                           | 87      | 280     | 0                                        | 37      | 8.7     |
| 15     | 96.2               | 0                               | 1640    | 1290    | 0                           | 304     | 115     | 0                                        | 25      | 6.8     |
| 16     | 97.3               | 0                               | 1920    | 4940    | 0                           | 84      | 608     | 0                                        | 48      | 36      |
| 17     | 98.4               | 0                               | 0       | 0       | 0                           | 0       | 0       | 0                                        | 13      | 5.6     |
| 18     | 99.5               | 0                               | 2400    | 1690    | 0                           | 288     | 36      | 0                                        | 0       | 0       |
| 19     | 91.8               | 0                               | 610     | 450     | 0                           | 0       | 0       | 0                                        | 12      | 0       |
| 20     | 98.4               | 0                               | 960     | 3680    | 0                           | 128     | 435     | 0                                        | 18      | 12      |

Note: LBR=lyophilized black raspberry powder.

**Supplementary Table S2: Summary of individual patient level changes in urinary, blood and tissue biomarkers following 26 weeks of LBR treatment**

| Pat ID | Tobacco Use             | Weight (kg, change) | 8-Iso-Pros (change) | 8-OHdG (change) | GSTpi (fold-change) | NF-κB (fold-change) | Zeaxanthin (change) | Uro A-Gluc (change) | Uro A-Sulf (change) | DMEAG (change) |
|--------|-------------------------|---------------------|---------------------|-----------------|---------------------|---------------------|---------------------|---------------------|---------------------|----------------|
| 1      | Never                   | 0.2                 | decrease            | no change       | 1.5                 | 1.4                 |                     |                     |                     | +              |
| 2      | Never                   | 2.0                 | ND                  | ND              | 1.5                 | -1.7                |                     | +                   |                     | +              |
| 3      | Past Smoker             | 0.5                 | no change           | increase        | 2.0                 | 1.2                 |                     | +                   |                     |                |
| 4      | Past Smoker             | 0.0                 | decrease            | decrease        | 3.0                 | -2.0                | +                   | +                   | +                   |                |
| 5      | Never                   | 6.6                 | no change           | increase        | 4.0                 | 3.5                 | +                   | +                   | +                   | +              |
| 6      | Never                   | -1.4                | no change           | no change       | 1.0                 | 2.0                 |                     | +                   | +                   | +              |
| 7      | Past Smoker             | 2.3                 | decrease            | decrease        | 1.0                 | -2.0                |                     | +                   | +                   | +              |
| 8      | Never                   | 0.9                 | decrease            | decrease        | 2.0                 | 1.0                 |                     | +                   | +                   | +              |
| 9      | Smoker                  | 6.8                 | decrease            | decrease        | 4.0                 | 1.0                 | +                   | +                   | +                   |                |
| 10     | Smoker                  | 3.2                 | no change           | increase        | 1.8                 | 1.0                 |                     | +                   |                     |                |
| 11     | Past Smoker             | 4.2                 | decrease            | decrease        | 1.2                 | -1.2                |                     |                     |                     | +              |
| 12     | Never                   | 1.2                 | no change           | increase        | 1.0                 | 1.0                 |                     | +                   | +                   | +              |
| 13     | Smoker                  | 1.5                 | decrease            | increase        | 1.0                 | -1.6                |                     | +                   |                     | +              |
| 14     | Past Smoker             | -0.3                | decrease            | increase        | 1.7                 | -1.5                | +                   | +                   | +                   | +              |
| 15     | Past Smoker             | 1.1                 | increase            | increase        | -1.3                | -6.0                |                     | +                   | +                   | +              |
| 16     | Past Smoker             | 2.5                 | no change           | increase        | 1.0                 | 1.0                 |                     | +                   | +                   | +              |
| 17     | Past Smoker & Smokeless | -0.2                | decrease            | no change       | 1.0                 | 1.0                 |                     |                     |                     | +              |
| 18     | Smokeless               | 0.8                 | no change           | increase        | 2.0                 | -10                 |                     | +                   | +                   |                |
| 19     | Never                   | 2.9                 | decrease            | decrease        | ND                  | ND                  |                     | +                   |                     |                |
| 20     | Never                   | 0.5                 | decrease            | no change       | ND                  | ND                  |                     | +                   | +                   | +              |

Note: LBR=lyophilized black raspberries. Change indicates the change of the variable at week 26 of study compared to baseline.
